# Supplementary material
Source: PubMed Central journal article supplement (PMC2562070)
Supplement: M804826200_1.pdf [file M804826200_1.pdf]

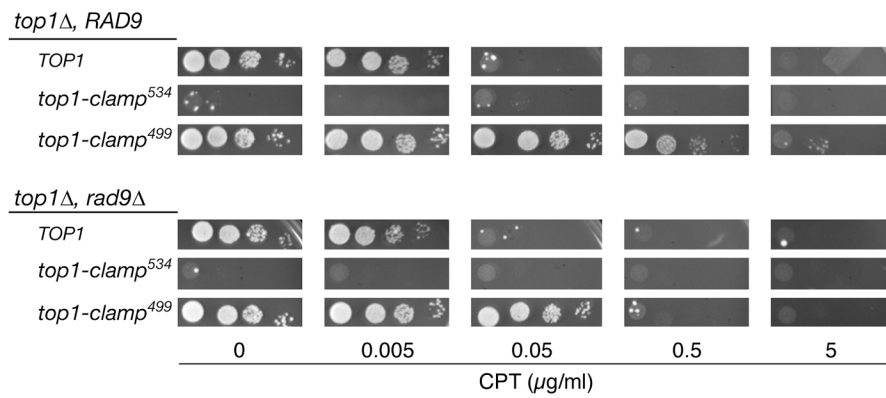

**FIG. 1S. The Rad9 DNA damage checkpoint protects cells from CPT poisoning of Top1-clamp<sup>499</sup>.** Exponential cultures of congenic *top1Δ* yeast cells, wild-type for *RAD9* or *rad9Δ*, transformed with the indicated YCpGAL1-*top1* vector, were serially 10-fold diluted. Aliquots of 5 μl were spotted onto SC-uracil supplemented with galactose, 25 mM HEPES, pH 7.2, the indicated concentration of CPT, and 0.125% Me2SO. Cell viability was assessed after incubation at 30°C.

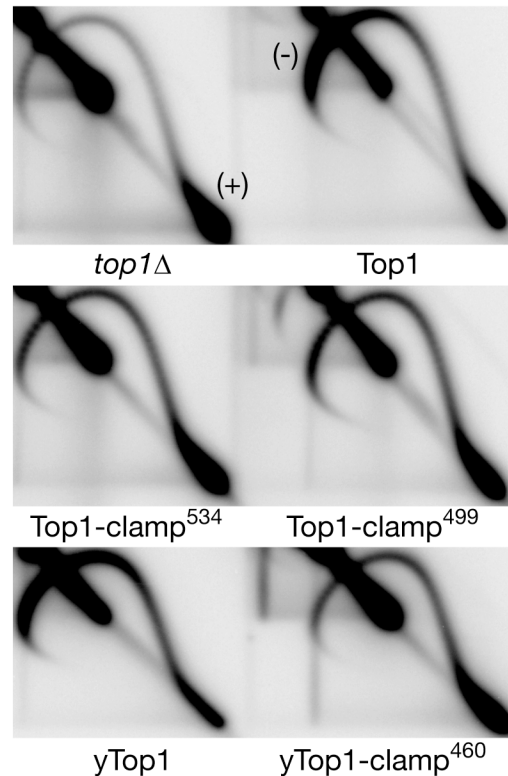

FIG. 2S. ***In vivo* Top1 activity assays.** The *in vivo* activity of the Top1-clamp proteins was assayed in 2-D agarose gels following purification of 2 $\mu$ m DNA topoisomers (1). Exponential cultures of *top1Δ*, *top2ts* cells, co-transformed with YEpGPD-topA (which constitutively expresses bacterial DNA topoisomerase I) and the indicated YCpGAL1-top1 vector (for galactose induced expression of yeast or human Top1), were grown at 26°C in SC-uracil, tryptophan media supplemented with 2% dextrose, diluted 100-fold into media supplemented with 2% raffinose and incubated at 26°C to an OD<sub>595</sub>=1. The cultures were then induced with a final 2% galactose for 5 hours. Half of the each culture was then shifted to nonpermissive temperature (36°C) for an additional 3 hours. An equal volume of pre-chilled toluene/ethanol mix in 20 mM TE (pH8.0) was added to prevent any alterations in DNA topology during plasmid purification. The purified plasmid DNA topoisomers were then resolved by 2-D agarose gel electrophoresis. In the first dimension, the gels were run in TBE buffer supplemented with 0.5  $\mu$ g/ml chloroquine. After pre-soaking the gel in TBE buffer supplemented with 2.5  $\mu$ g/ml chloroquine for 3 hours, the gels were electrophoresed in the same buffer in the second dimension. Plasmid topoisomers were visualized by southern blotting using <sup>32</sup>P-labeled 2 $\mu$ m plasmid probes followed by autoradiography. The relative position of negatively and positively supercoiled DNAs along the topoisomer arc are indicated by (-) and (+), respectively.

In the absence of a functional DNA topoisomerase I and II (*top1Δ*), the bacterial type I enzyme will selectively catalyze the relaxation of negatively supercoiled DNA generated by divergent transcription units within the 2 $\mu$ m plasmid (2). The net result is the accumulation of positively supercoiled DNA topoisomers [(+) in panel *top1Δ*]. However, if a catalytically active human type I enzyme (Top1) or yeast Top1 (yTop1) is also expressed in these cells, this enzyme also relaxes (+) supercoiled DNA (3), as evidenced by a shift in topoisomer distribution seen as an increase of (-) in panel Top1 and yTop1. Human Top1-clamp<sup>534</sup> and Top1-clamp<sup>499</sup>, as well as yTop1-clamp<sup>460</sup>, are all active *in vivo*, albeit at lower levels than that observed for the corresponding wild-type enzymes.

1. Hann, C.L., Carlberg, A.L., and Bjornsti, M-A. (1998) *J Biol Chem* 273, 31519-31527.
2. Giaever, G.N. and Wang, J.C. (1988) *Cell* 55, 849-856.
3. Knab, A.M., Fertala, J., and Bjornsti, M-A. (1993) *J Biol Chem* 268, 22322-22330.
